# Supplementary material
Source: PubMed Central journal article supplement (PMC1557465)
Supplement: mmi060-1136-S1.pdf [file mmi060-1136-S1.pdf]

## Supplementary Online Material

### *Supplementary Online Text*

#### **Lateral gene transfer versus groups and/or virulence.**

Within the ECOR collection, the copy numbers of the insertion elements IS1 through IS5 and IS30 distinguish A ( $22.7 \text{ copies} \pm 2.5$ ) and D (virulent,  $21.6 \pm 4.8$ ) from the virulent groups B2 ( $8.2 \pm 1.0$ ) and B1 ( $6.3 \pm 2.0$ ) (t-test,  $P < 0.01$ ) (Sawyer et al. 1987). Additional analyses of the numbers of transposases and transposase-like sequences in published *E. coli* genomes also show no clear correlation with virulence or group, except that transposons are particularly frequent in *Shigella flexneri* (ABD, strain 2457T: 152.9 copies/MB; strain 301: 66.2) due to “local hopping” (Boyd and Hartl 1997) in contrast to K12 (A, 20.7), the uropathogen CFT073 (B2, 18.7) or O157:H7 strains (ABD, 9.2). Thus, there does not seem to be a clear association with the numbers of IS elements or transposases and virulence.

One might expect more frequent recombination among virulent lineages to be an indirect consequence of a higher frequency of genetic exchange by transduction and conjugation. Among other factors, the efficiency of conjugation and transduction is reduced by restriction enzymes that degrade unmodified DNA. Using the same strategy as above, we screened the *E. coli* genomes for coding sequences (CDSs) encoding restriction/modification enzymes. Again, no clear pattern could be discerned. Both of the virulent *Shigella* genomes possess nearly one hundred CDSs encoding restriction/modification genes but K12 does as well, whereas the O157:H7 and CFT073 genomes possess  $< 10$  copies. Thus, it seems unlikely that more frequent homologous recombination among virulent lineages reflects increased opportunities for genetic exchange.

Table S1. Oligonucleotide primers used for *E. coli* MLST

| Locus size        | Gene                                     | Primer  | Sequence (5' – 3')                  |
|-------------------|------------------------------------------|---------|-------------------------------------|
| <i>adk</i> (536)  | adenylate kinase                         | adk-P1  | ATTCTGCTTGGCGCTCCGGG                |
|                   |                                          | adk-P2  | CCGTCAACTTTTCGCGTATTT               |
| <i>fumC</i> (469) | fumarate hydratase                       | fumC-P1 | TCACAGGTCGCCAGCGCTTC                |
|                   |                                          | fumC-P2 | GTACGCAGCGAAAAAGATTC                |
| <i>gyrB</i> (460) | DNA gyrase                               | gyrB-P1 | TCGGCGACACGGATGACGGC                |
|                   |                                          | gyrB-P2 | ATCAGGCCTTCACGCGCATC                |
| <i>icd</i> (518)  | isocitrate/isopropylmalate dehydrogenase | icd-P1  | ATGGAAAGTAAAGTAGTTGTTCCGGCACA       |
|                   |                                          | icd-P2  | GGACGCAGCAGGATCTGTT                 |
| <i>mdh</i> (452)  | malate dehydrogenase                     | mdh-P1  | ATGAAAGTCGCAGTCCTCGGCGCTGCTGGCGG    |
|                   |                                          | mdh-P2  | TTAACGAACTCCTGCCCCAGAGCGATATCTTTCTT |
| <i>purA</i> (478) | adenylosuccinate dehydrogenase           | purA-P1 | CGCGCTGATGAAAGAGATGA                |
|                   |                                          | purA-P2 | CATACGGTAAGCCACGCAGA                |
| <i>recA</i> (510) | ATP/GTP binding motif                    | recA-P1 | CGCATTGCTTTACCCTGACC                |
|                   |                                          | recA-P2 | TCTCGATCAGCTTCTCTTTT                |

Table S2. Sources of 460 *E. coli* by group

| Category  | Subdivision<br>(Total)     | A  | AxB1 | B1 | B2 | D  | ABD |
|-----------|----------------------------|----|------|----|----|----|-----|
| Host:     | domesticated (61)          | 16 | 6    | 12 | 15 | 5  | 7   |
|           | captive (26)               | 4  | 5    | 6  | 6  | 3  | 2   |
|           | wild (24)                  | 1  | 3    | 8  | 5  | 5  | 2   |
|           | human (346)                | 78 | 48   | 82 | 43 | 20 | 75  |
| Continent | Europe (170)               | 19 | 10   | 43 | 50 | 16 | 32  |
|           | Africa (118)               | 62 | 22   | 20 | 0  | 6  | 8   |
|           | North America (58)         | 11 | 9    | 11 | 12 | 3  | 12  |
|           | Asia+Pacific (24)          | 4  | 6    | 4  | 4  | 4  | 2   |
| Pathogens | K1 (46)                    | 0  | 1    | 0  | 30 | 3  | 12  |
|           | EHEC (41)                  | 1  | 4    | 23 | 0  | 1  | 12  |
|           | EIEC (38)                  | 0  | 13   | 12 | 0  | 2  | 11  |
|           | EPEC (20)                  | 1  | 0    | 9  | 6  | 0  | 4   |
|           | ETEC (13)                  | 7  | 3    | 2  | 1  | 0  | 0   |
|           | APEC (13)                  | 0  | 0    | 4  | 5  | 1  | 3   |
|           | EAEC (9)                   | 5  | 0    | 1  | 0  | 3  | 0   |
|           | <i>S. dysenteriae</i> (23) | 0  | 1    | 9  | 0  | 4  | 9   |
|           | <i>S. boydii</i> (19)      | 0  | 1    | 9  | 0  | 0  | 9   |
|           | <i>S. flexneri</i> (16)    | 0  | 1    | 2  | 0  | 0  | 13  |
|           | <i>S. sonnei</i> (3)       | 0  | 0    | 3  | 0  | 0  | 0   |

Table S3: Nucleotide diversity ( $\pi$ ), Tajima's D test and Homoplasy ( $H$ ) ratio test for the four *E. coli* populations, as well as for the two major hybrid groups. The top half of the table includes all isolates and the bottom half, STs only.

| <i>Population</i> | Sample size | $\pi$ | Tajima's D | <i>H</i> ratio |
|-------------------|-------------|-------|------------|----------------|
| <i>A</i>          | 99          | 0.004 | -0.882     |                |
| <i>B1</i>         | 106         | 0.006 | -0.102     |                |
| <i>B2</i>         | 70          | 0.005 | -1.084     |                |
| <i>D</i>          | 34          | 0.013 | -0.237     |                |
| <i>AxB1</i>       | 66          | 0.008 | -0.371     |                |
| <i>ABD</i>        | 85          | 0.013 | -0.509     |                |
| <i>A</i>          | 51          | 0.005 | -0.582     | 0.298          |
| <i>B1</i>         | 56          | 0.006 | -0.261     | 0.385          |
| <i>B2</i>         | 36          | 0.006 | -0.912     | 0.509          |
| <i>D</i>          | 28          | 0.014 | -0.240     | 0.489          |
| <i>AxB1</i>       | 50          | 0.007 | -0.646     | 0.384          |
| <i>ABD</i>        | 55          | 0.013 | -0.849     | 0.515          |

$\pi$ , Kimura 2-parameter

Table S4. Properties of Sequences Types (STs) and ST complexes

| Grouping   | Number   |     | Common Properties                             |
|------------|----------|-----|-----------------------------------------------|
|            | Isolates | STs |                                               |
| ST3 Cplx   | 14       | 4   | EHEC/EPEC; HUS/diarrhoea; O103:H2/O111/O128   |
| ST6 Cplx   | 12       | 4   | EIEC; O124:H30/O152                           |
| ST10 Cplx  | 90       | 44  | global; group A; few pathogens (ETEC/EAEC)    |
| ST11       | 8        | 1   | EHEC; HUS/diarrhoea; O157:H7/H                |
| ST13 Cplx  | 9        | 7   | global; occasional EHEC/diarrhoea             |
| ST14 Cplx  | 5        | 3   | UPEC; UTI                                     |
| ST21 Cplx  | 13       | 6   | EHEC/EPEC; HUS/diarrhoea; O26:H11/O111:H      |
| ST28 Cplx  | 4        | 3   | EHEC/EPEC; diarrhoea                          |
| ST31 Cplx  | 4        | 3   | EAEC; diarrhoea                               |
| ST62       | 6        | 1   | NBM/UTI/faecal; O7:K1; OMP 3                  |
| ST73 Cplx  | 11       | 3   | UTI; O25:H1/O6:H1                             |
| ST77 Cplx  | 5        | 2   | Global; non-pathogens                         |
| ST90 Cplx  | 10       | 4   | APEC/EHEC; sepsis/diarrhoea/UTI; O78:K80/O8   |
| ST95 Cplx  | 22       | 5   | APEC; sepsis/UTI/NBM; O1/O2/O18:K1; OMP 6/9   |
| ST149 Cplx | 3        | 3   | <i>Shigella boydii</i>                        |
| ST152 Cplx | 3        | 3   | <i>Shigella sonnei</i>                        |
| ST155 Cplx | 19       | 11  | global; occasional diarrhoea                  |
| ST184 Cplx | 3        | 3   | Ghana; non-pathogens                          |
| ST226 Cplx | 4        | 4   | global; diarrhoea                             |
| ST243 Cplx | 23       | 12  | <i>Shigella dysenteriae, boydii, flexneri</i> |
| ST245 Cplx | 13       | 8   | <i>Shigella flexneri</i>                      |
| ST250 Cplx | 6        | 6   | <i>Shigella dysenteriae, boydii</i> / EIEC    |
| ST270 Cplx | 11       | 7   | EIEC; O28ac/O136                              |
| ST272 Cplx | 3        | 3   | EIEC; O144                                    |
| ST280 Cplx | 8        | 7   | EIEC; O143/O167                               |

## Reference List

1. Boyd, E.F., and Hartl, D.L. (1997). Nonrandom location of IS1 elements in the genomes of natural isolates of *Escherichia coli*. *Mol. Biol. Evol.* 14, 725-732.
2. Sawyer, S.A., Dykhuizen, D.E., DUbose, R.F., Green, L., Mutangadura-Mhlanga, T., Wolczyk, D.F., and hartl, D.L. (1987). Distribution and abundance of insertion sequences among natural isolates of *Escherichia coli*. *Genetics* 115, 51-63.

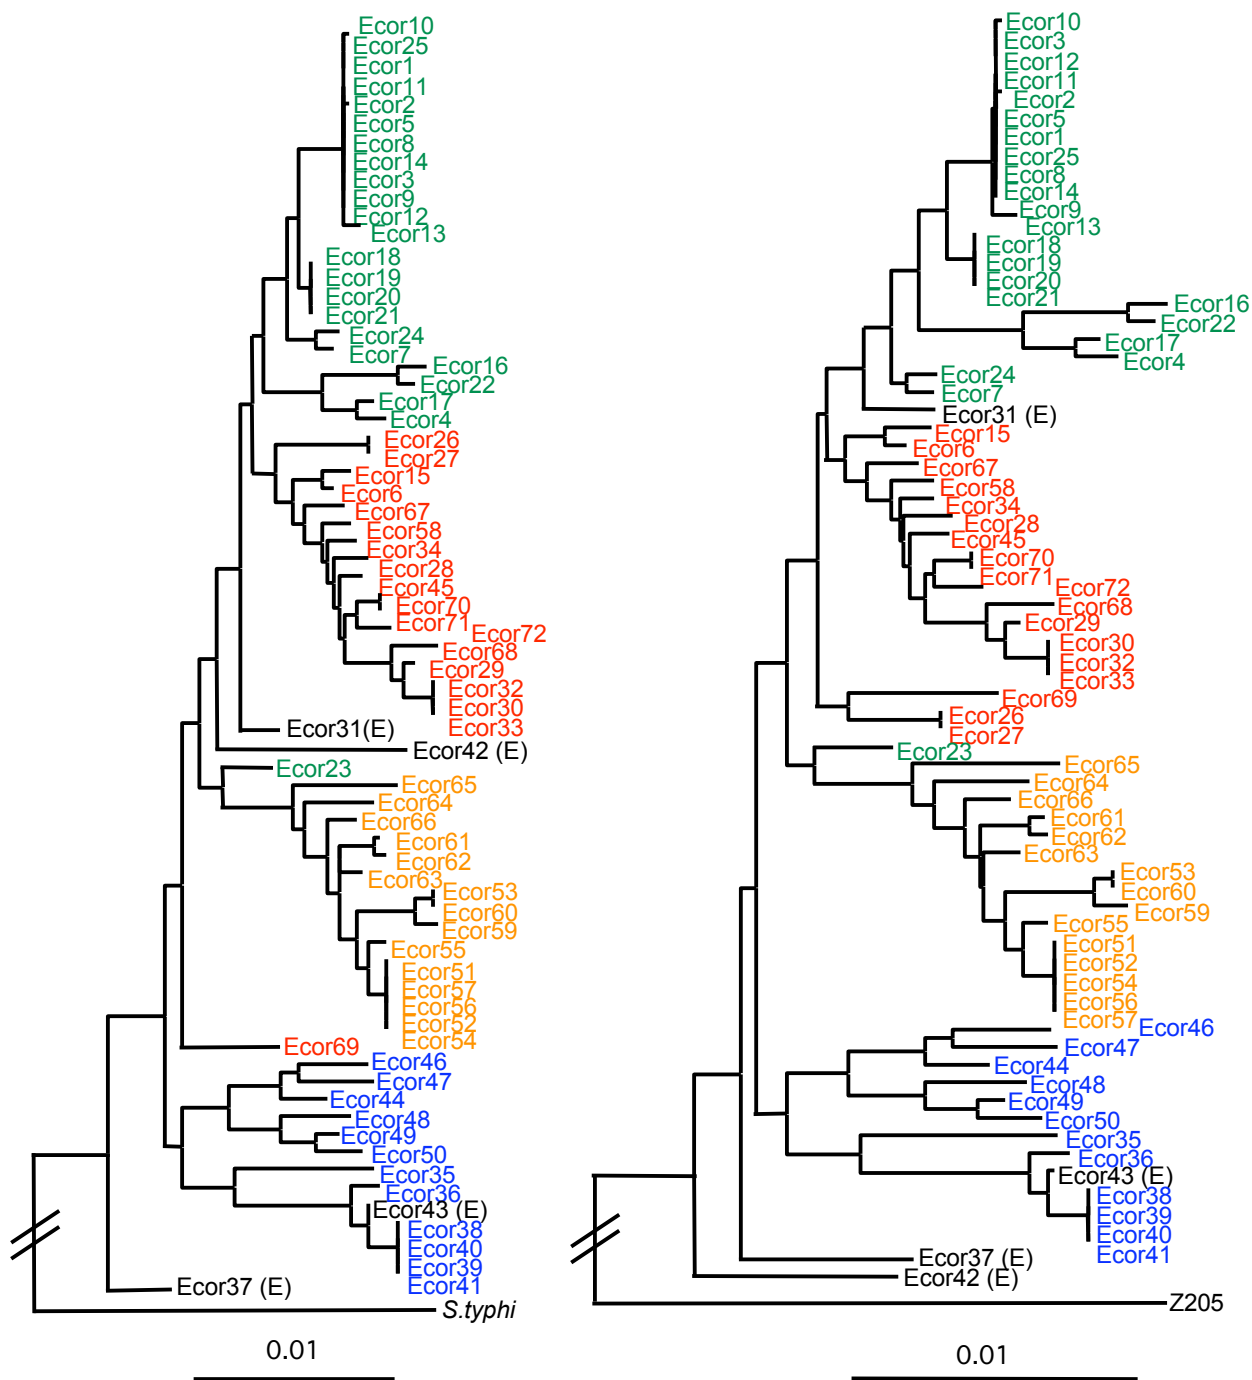

Fig S1. Neighbour-joining trees of the Ecor collection based on the seven concatenated housekeeping genes using the GTR+G+I model. Notice that the trees are rooted with different outgroups. The different strains are colour-coded: group A in green, B1 in red, B2 in yellow, D in blue and E in black.
